# Supplementary material for: A two-dimensional Sb/InS van der Waals heterostructure for electronic and optical related applications
Source: Royal Society of Chemistry journal article supplement (doi:10.1039/d2cp03060h), 2022-01-01
Supplement: d2cp03060h1.pdf [file d2cp03060h1.pdf]

## Two-Dimensional Sb/InS van der Waals Heterostructure for Electronic and Optical Related Applications

J. Zhang,<sup>a</sup> C. Y. Xu,<sup>a,\*</sup> Z. X. Guo<sup>a</sup>, L. P. Han,<sup>b,\*</sup>

<sup>a</sup>*Jilin Engineering Laboratory for Quantum Information Technology, Institute for Interdisciplinary Quantum Information Technology, Jilin Engineering Normal University, Changchun 130052, China. E-mail: [xcy@jlenu.edu.cn](mailto:xcy@jlenu.edu.cn)*

<sup>b</sup>*Key Laboratory of Automobile Materials, Ministry of Education, and School of Materials Science and Engineering, Jilin University, Changchun 130022, China. E-mail: [lphan@jlu.edu.cn](mailto:lphan@jlu.edu.cn)*

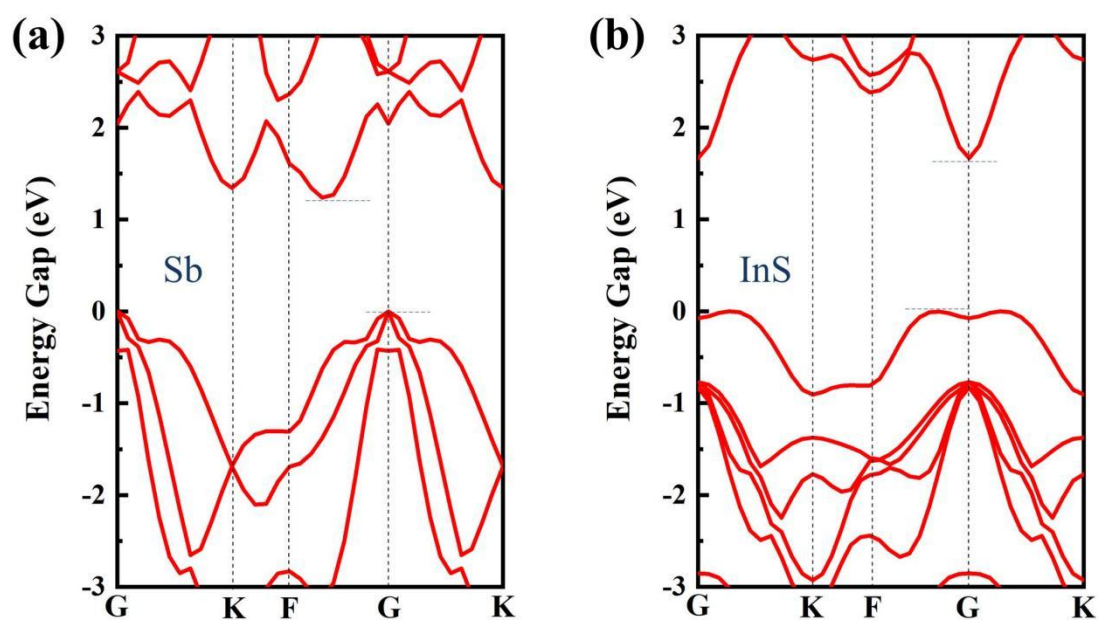

**Figure S1.** Calculated band structures of (a) Sb and (b) InS monolayer, respectively.

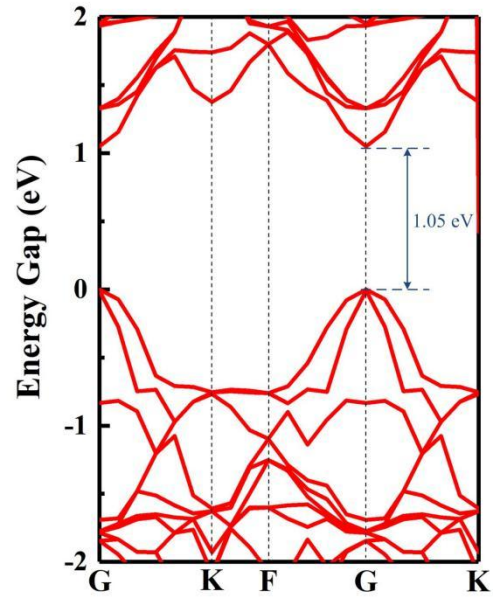

**Figure S2.** Calculated band structure of Sb/InS bilayer by the HSE06 functional.
